# Supplementary material
Source: MDPI journal article supplement (https://www.mdpi.com/search?q=toxins-09-00184)
Supplement: s001 [file toxins-09-00184-s001.pdf]

# Supplementary Materials: Screening of Deoxynivalenol Producing Strains and Elucidation of Possible Toxicogenic Molecular Mechanism

Xiangfeng Zheng, Xiaoli Zhang, Lina Zhao, Maurice T. Apaliya, Qiya Yang, Wei Sun, Xiaoyun Zhang and Hongyin Zhang

**Table S1.** Summary of total RNA sequencing quality in Fg1 and Fg2

| Sample | Raw reads | Clean reads | Clean bases | Error rate(%) | Q20(%) | Q30(%) | GC (%) |
|--------|-----------|-------------|-------------|---------------|--------|--------|--------|
| Fg1    | 32447410  | 26363446    | 3.95G       | 0.02          | 96.09  | 90.26  | 52.40  |
| Fg2    | 33489384  | 31301746    | 4.70G       | 0.03          | 95.90  | 88.59  | 52.74  |

**Table S2.** The reads mapped to the reference genome of *F. graminearum* PH-1

| Sample_name      | Fg1               | Fg2               |
|------------------|-------------------|-------------------|
| Total reads      | 26363446          | 31301746          |
| Total mapped     | 21449066 (81.36%) | 24434800 (78.06%) |
| Multiple mapped  | 199832 (0.76%)    | 37180 (0.12%)     |
| Uniquely mapped  | 21249234 (80.6%)  | 24397620 (77.94%) |
| Reads map to '+' | 10619448 (40.28%) | 12204521 (38.99%) |
| Reads map to '-' | 10629786 (40.32%) | 12193099 (38.95%) |
| Non-splice reads | 17467139 (66.26%) | 19627198 (62.7%)  |
| Splice reads     | 3782095 (14.35%)  | 4770422 (15.24%)  |

**Table S3.** Primers used for verification of differentially expressed genes

| Gene ID        | Gene description     | Forward primer (5'to 3')     | Revers primer (5'to 3')      |
|----------------|----------------------|------------------------------|------------------------------|
| FGSG_0881<br>1 | EF1A                 | GGCTTTCACCGACTACCCCTC<br>CTC | ACTTCTCGACGGCCTTGATGAC<br>AC |
| FGSG_0926<br>6 | HMG-CoA Synthase     | ACTTCCCCAGCCAGTATGTT         | CGGTAAGAGCGAAAGAGTAG<br>AT   |
| FGSG_0919<br>7 | HMG-CoA reductase    | CTCCCACCCAATCCACA            | AGACACGGCTTCCTTCAA           |
| FGSG_0591<br>2 | Mevalonate Kinase    | ATGAAACTGAACCGCAAGA          | AAAGGGTGGTAACGTGTAGG         |
| FGSG_0976<br>4 | 5'-Phosphomevalonate | CTGAGTGGGATGTTGAGGTT         | TTGGAGTCTTCGGGGTTT           |
| FGSG_0678<br>4 | FPP synthase         | TACCGTCAGGAGGGTGTTG          | GGAAGGTGGTCTCGTGGAA          |
| FGSG_0353<br>7 | TRI5                 | TTTCCCACCGAGTATTTTCT         | TAGGGTCTACCTTGAGCATCT        |
| FGSG_0353<br>5 | TRI4                 | TGTTGCTGGGATTTTCGC           | CGTATTTATCGTGCATCTTGA        |
| FGSG_0789<br>6 | TRI101               | CTACACCCAAATCAGTCTCC<br>T    | TTTCCCTCGCTAATGCC            |
| FGSG_0354<br>0 | Tri11                | TGCTTCCTCGGGGTCTT            | CCACGAAATCTGGTCTGTCT         |
| FGSG_0353<br>4 | TRI3                 | CGGCAGCCAAGGATAAC            | CCCGATAAACTTTGACAACC<br>GATT |
| FGSG_0353<br>3 | TRI7                 | GAGAACGCCAAAGGAAAA           | AAGCAATAACCCCAACGA           |
| FGSG_0353<br>2 | TRI8                 | GTCAAGGGCTCTTCGTTTC          | CTGGGCGTGTGGTCAT             |
| FGSG_0046<br>9 | STPK                 | CCATCTTCTCCTGACCGACT<br>T    | CACCAACTTCTGCTTGACAAT<br>G   |
| FGSG_0131<br>2 | Cek1                 | GGCTATCTACTACGGCTCTA<br>ACA  | CCAGGTCTTCCATCCACTTGA        |
| FGSG_1014<br>2 | Atf1                 | GAACAACATCCGCCATCCA<br>A     | CGCATCGCTCATCGTAGAC          |
